# Supplementary material for: Facet-dependent synthesis of H2O2 from H2 and O2 over single Pt atom-modified Pd nanocrystal catalysts
Source: Royal Society of Chemistry journal article supplement (doi:10.1039/d4sc01560f), 2024-01-01
Supplement: d4sc01560f1.pdf [file d4sc01560f1.pdf]

## Supplementary Information

### Facet-dependent synthesis of H<sub>2</sub>O<sub>2</sub> from H<sub>2</sub> and O<sub>2</sub> over single-atom Pt modified Pd nanocrystal catalysts

Ying Zhang,<sup>a</sup> Qingdi Sun,<sup>a</sup> Ziyue Wang,<sup>a</sup> Guanghui Guo,<sup>a</sup> Hao Liu,<sup>a</sup> Xiaohui He<sup>\*ac</sup> and Hongbing Ji<sup>\*ab</sup>

<sup>a</sup> Key Laboratory of Bioinorganic and Synthetic Chemistry of Ministry of Education, Fine Chemical Industry Research Institute, School of Chemistry, IGCME, Sun Yat-sen University, Guangzhou 510275, China.

<sup>b</sup> State Key Laboratory Breeding Base of Green-Chemical Synthesis Technology, Institute of Green Petroleum Processing and Light Hydrocarbon Conversion, College of Chemical Engineering, Zhejiang University of Technology, Hangzhou, 310014 P. R. China.

<sup>c</sup> Guangdong Technology Research Center for Synthesis and Separation of Thermosensitive Chemicals.

\*Corresponding Author(s): Hongbing Ji: jihb@mail.sysu.edu.cn; Xiaohui He: hexiaohui@mail.sysu.edu.cn.

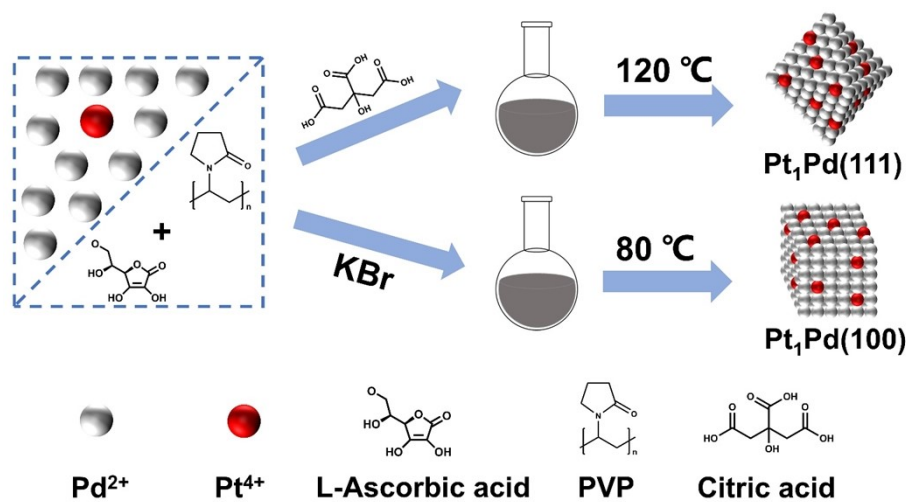

**Figure S1.** Schematic illustration of the synthetic pathways leading to the formation of the  $\text{Pt}_1\text{Pd}(111)$  and  $\text{Pt}_1\text{Pd}(100)$  nanocrystal.

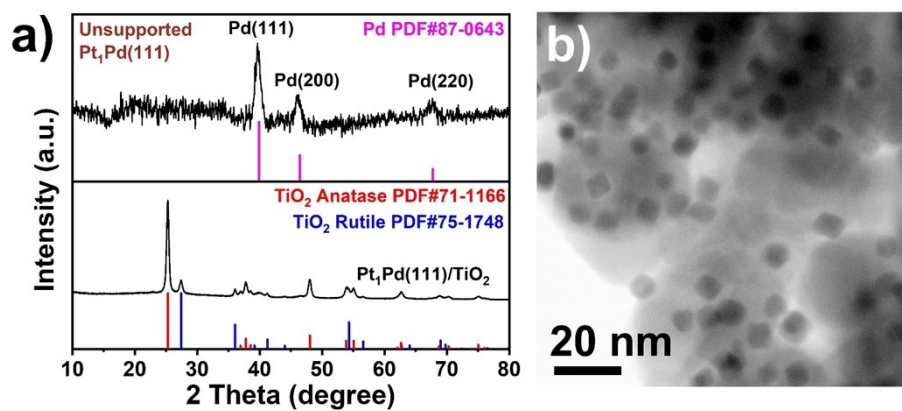

**Figure S2.** a) XRD patterns of Pt<sub>1</sub>Pd(111) nanocrystal and Pt<sub>1</sub>Pd(111)/TiO<sub>2</sub>. b) Bright-field STEM image of Pt<sub>1</sub>Pd(111)/TiO<sub>2</sub>.

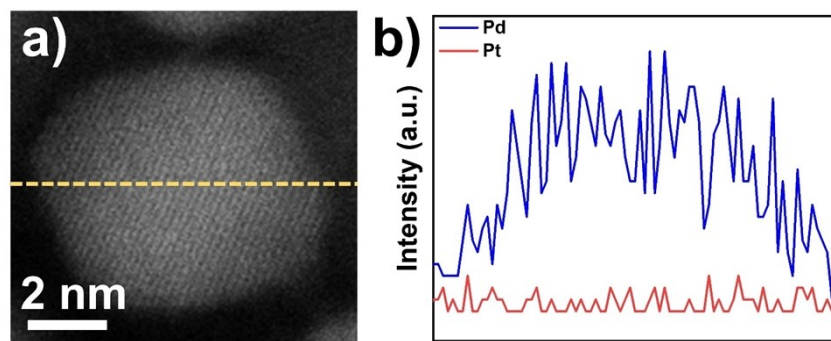

**Figure S3.** a) HAADF-STEM image of Pt<sub>1</sub>Pd(111) nanocrystal on TiO<sub>2</sub>. b) Elemental line-scan profiles along the direction marked by a yellow line in a).

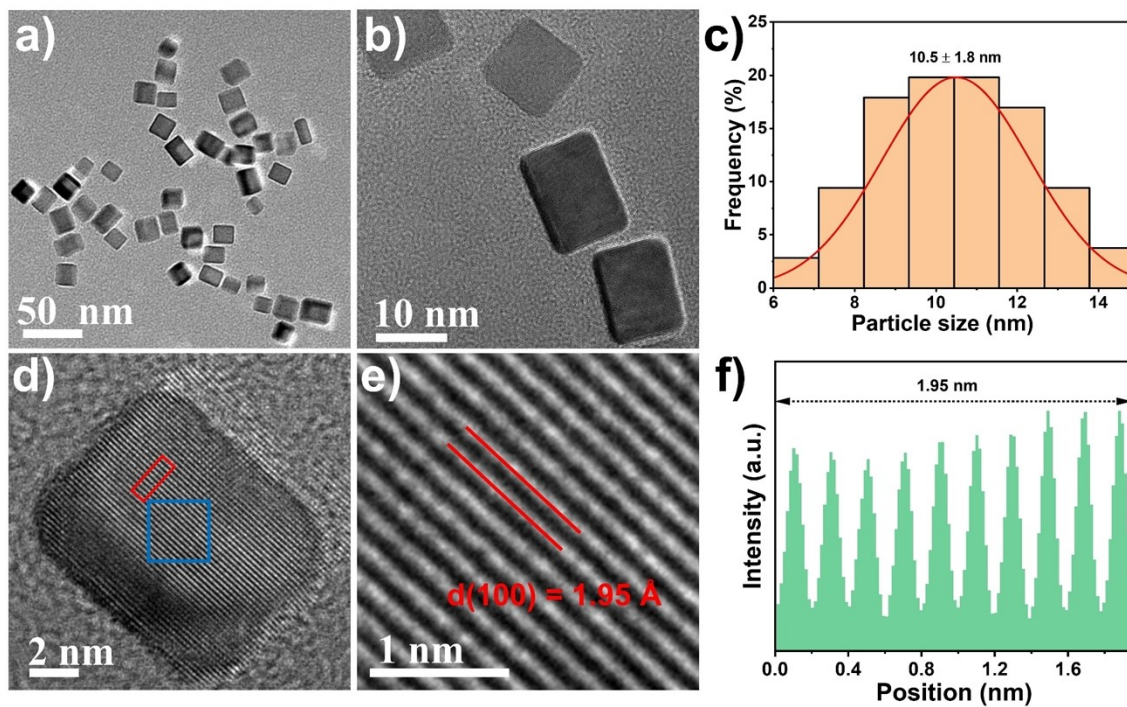

**Figure S4.** Morphology and structure representation of monodispersed Pt<sub>1</sub>Pd(100) nanocrystal. a) Representative TEM image. b, d) High-resolution TEM images. c) Particle size distribution of Pt<sub>1</sub>Pd(100) nanocrystal. e) Magnified TEM image in the blue box from d). f) Intensity profile of the red box from d).

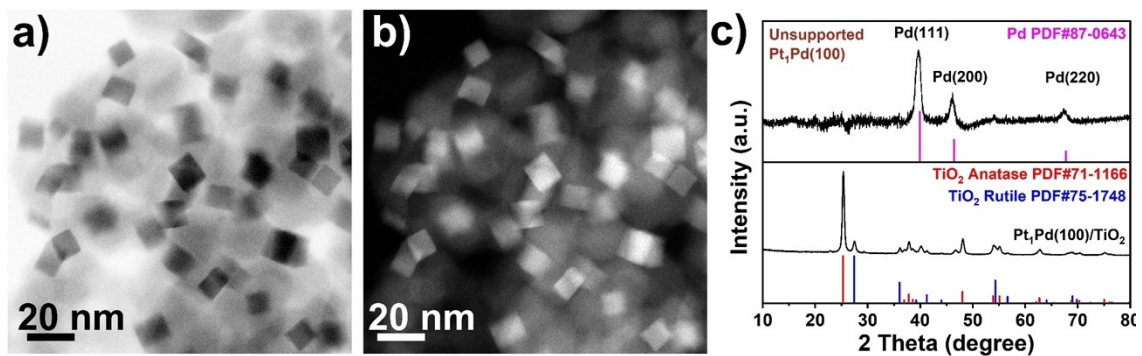

**Figure S5.** a) Bright-fields and b) dark-fields STEM images of Pt<sub>1</sub>Pd(100)/TiO<sub>2</sub>. c) PXRD patterns of Pt<sub>1</sub>Pd(100) nanocrystal and Pt<sub>1</sub>Pd(100)/TiO<sub>2</sub>.

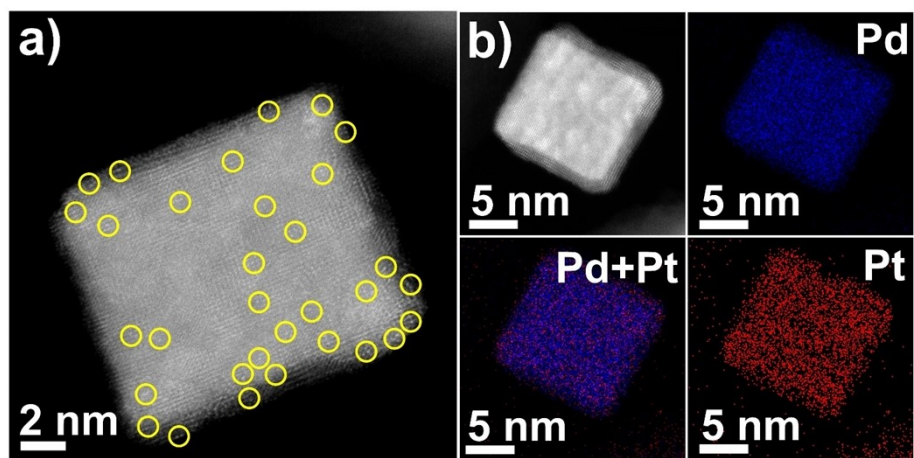

**Figure S6.** a) AC HAADF-STEM image of Pt<sub>1</sub>Pd(100)/TiO<sub>2</sub>, Pt single atoms are highlighted by the yellow circles. b) EDS mapping of Pt<sub>1</sub>Pd(100)/TiO<sub>2</sub>.

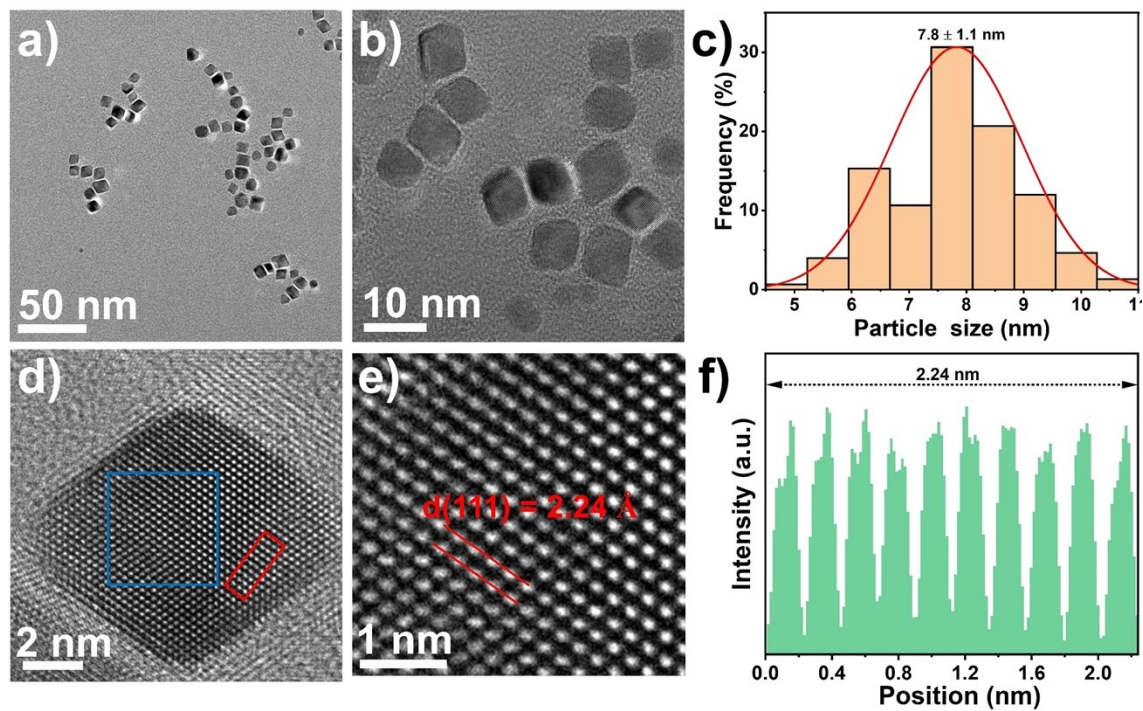

**Figure S7.** Morphology and structure representation of monodispersed Pd(111) nanocrystal. a) Representative TEM image. b, d) High-resolution TEM images. c) Particle size distribution of Pd(111) nanocrystal. e) Magnified TEM image in the blue box from d). f) Intensity profile of the red box from d).



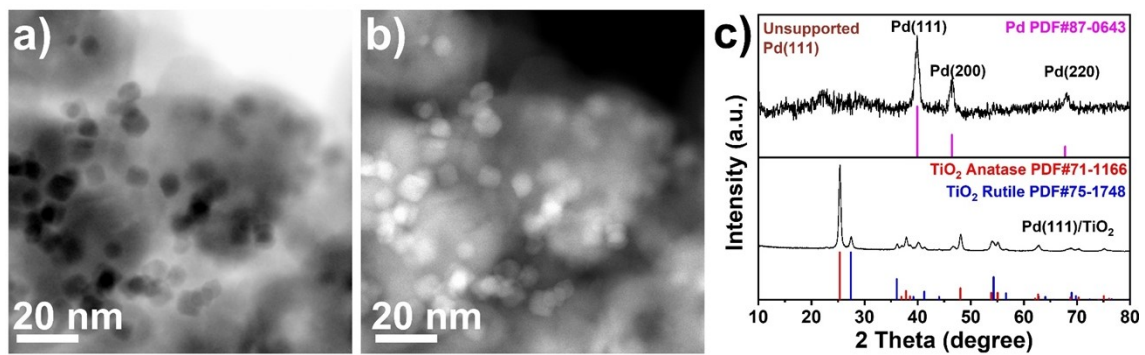

**Figure S8.** a) Bright-fields and b) dark-fields STEM images of Pd(111)/TiO<sub>2</sub>. c) PXRD patterns of Pd(111) nanocrystal and Pd(111)/TiO<sub>2</sub>.

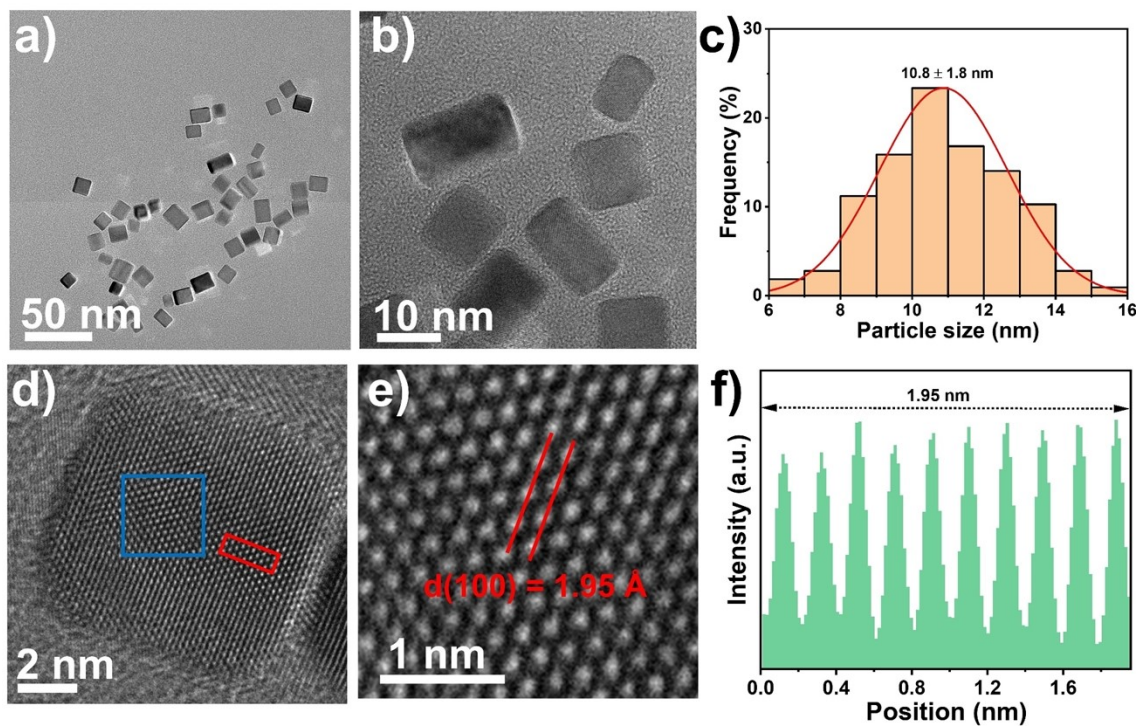

**Figure S9.** Morphology and structure representation of monodispersed Pd(100) nanocrystal. a) Representative TEM image. b, d) High-resolution TEM images. c) Particle size distribution of Pd(100) nanocrystal. e) Magnified TEM image in the blue box from d). f) Intensity profile of the red box from d).

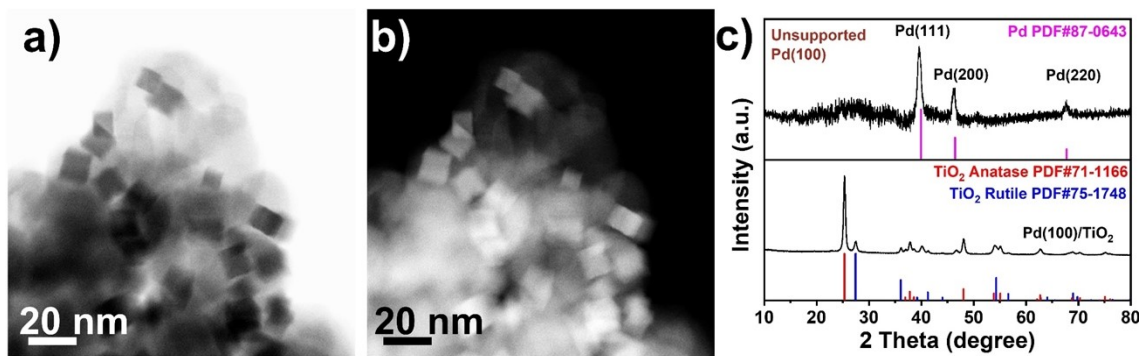

**Figure S10.** a) Bright-fields and b) dark-fields STEM images of Pd(100)/TiO<sub>2</sub>. c) PXRD patterns of Pd(100) nanocrystal and Pd(100)/TiO<sub>2</sub>.

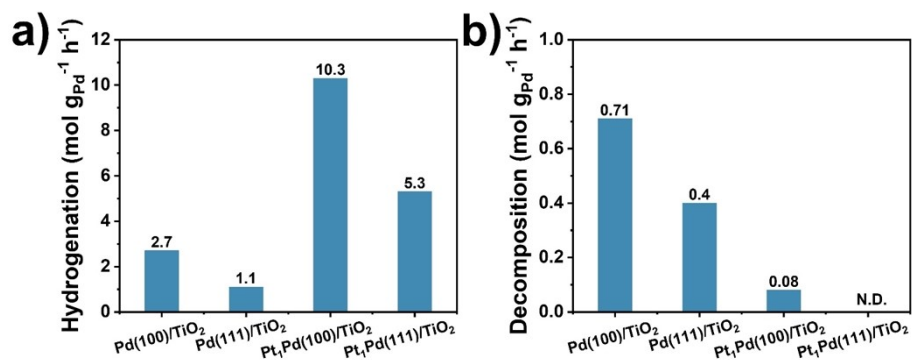

**Figure S11.** Comparison of H<sub>2</sub>O<sub>2</sub> a) hydrogenation and b) decomposition on various catalysts. Reaction condition: a) 10 mL CH<sub>3</sub>OH, H<sub>2</sub>O<sub>2</sub>: 250 μL, 0.02 M HCl, 2.9 MPa 5% H<sub>2</sub>/N<sub>2</sub>, T = 0 °C, catalyst weight: 10 mg, and stirring: 1200 rpm. b) 10 mL CH<sub>3</sub>OH, H<sub>2</sub>O<sub>2</sub>: 250 μL, 0.02 M HCl, 4 MPa N<sub>2</sub>, T = 0 °C, catalyst weight: 10 mg, and stirring: 1200 rpm.

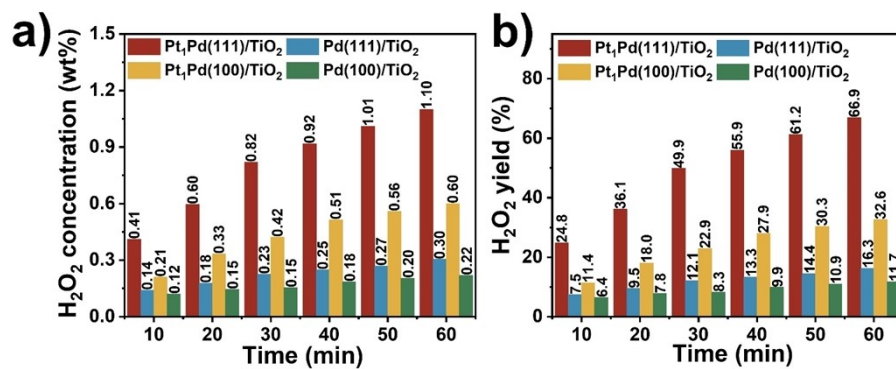

**Figure S12.** Comparison of a) H<sub>2</sub>O<sub>2</sub> concentration and b) H<sub>2</sub>O<sub>2</sub> yield as a function of reaction time towards H<sub>2</sub>O<sub>2</sub> synthesis. Reaction condition: 10 mL CH<sub>3</sub>OH, 0.02 M HCl, 2.9 MPa 5% H<sub>2</sub>/N<sub>2</sub>, 1.1 MPa 25% O<sub>2</sub>/N<sub>2</sub>, T = 0 °C, catalyst weight: 10 mg, and stirring: 1200 rpm.

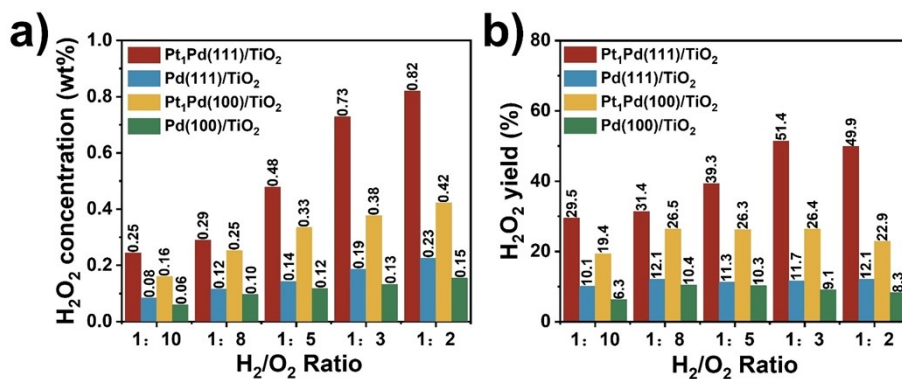

**Figure S13.** Comparison of a) H<sub>2</sub>O<sub>2</sub> concentration and b) H<sub>2</sub>O<sub>2</sub> yield with different H<sub>2</sub>/O<sub>2</sub> ratio towards H<sub>2</sub>O<sub>2</sub> synthesis. Reaction condition: 10 mL CH<sub>3</sub>OH, 0.02 M HCl, T = 0 °C, catalyst weight: 10 mg, time: 30 minutes, and stirring: 1200 rpm.

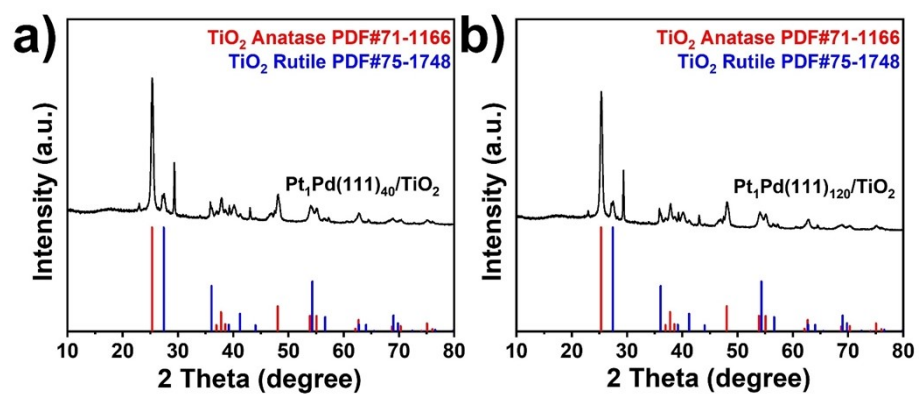

Figure S14. PXRD patterns of a) Pt<sub>1</sub>Pd(111)<sub>40</sub>/TiO<sub>2</sub> and b) Pt<sub>1</sub>Pd(111)<sub>120</sub>/TiO<sub>2</sub>.

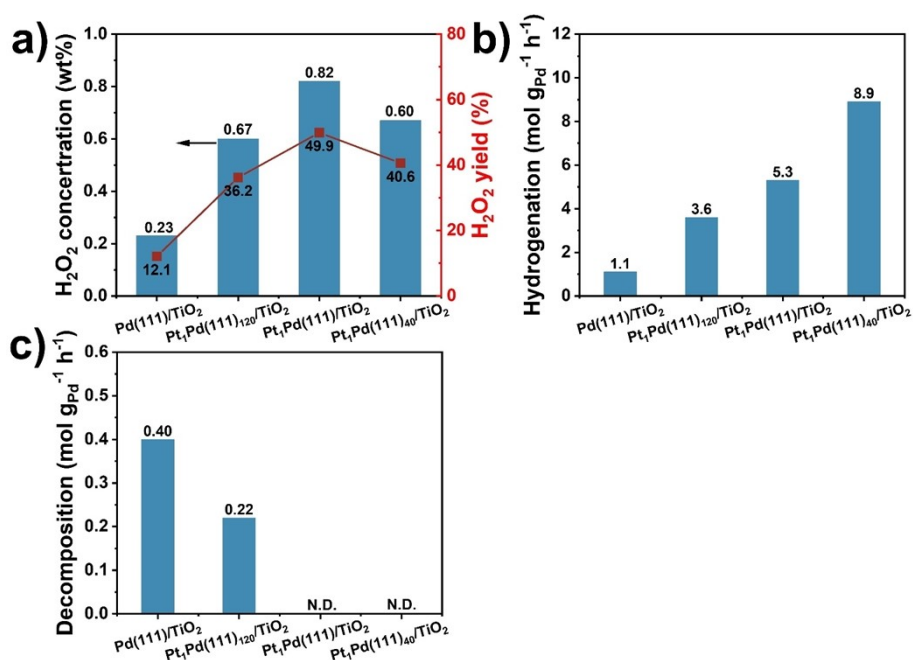

**Figure S15.** a) H<sub>2</sub>O<sub>2</sub> concentration and H<sub>2</sub> yield, b) H<sub>2</sub>O<sub>2</sub> hydrogenation, and c) H<sub>2</sub>O<sub>2</sub> decomposition with different Pd/Pt atomic ratio in direct synthesis of H<sub>2</sub>O<sub>2</sub>. Reaction condition: a) 10 mL CH<sub>3</sub>OH, 0.02 M HCl, 2.9 MPa 5% H<sub>2</sub>/N<sub>2</sub>, 1.1 MPa 25% O<sub>2</sub>/N<sub>2</sub>, T = 0 °C, catalyst weight: 10 mg, time: 30 minutes, and stirring: 1200 rpm. b) 10 mL CH<sub>3</sub>OH, H<sub>2</sub>O<sub>2</sub>: 250 μL, 0.02 M HCl, 2.9 MPa 5% H<sub>2</sub>/N<sub>2</sub>, T = 0 °C, catalyst weight: 10 mg, and stirring: 1200 rpm. c) 10 mL CH<sub>3</sub>OH, H<sub>2</sub>O<sub>2</sub>: 250 μL, 0.02 M HCl, 4 MPa N<sub>2</sub>, T = 0 °C, catalyst weight: 10 mg, and stirring: 1200 rpm.



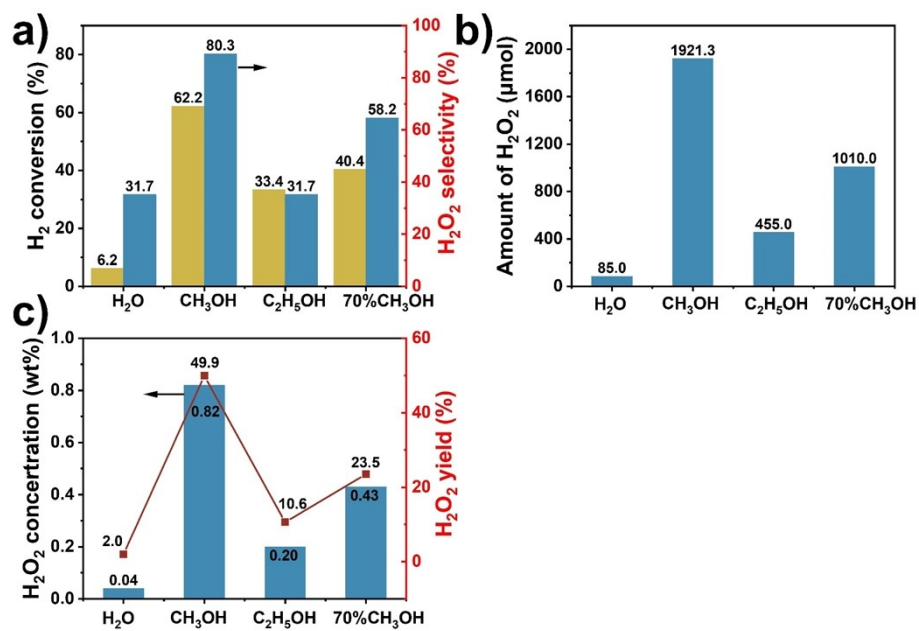

**Figure S16.** Comparison of a) H<sub>2</sub> conversion and H<sub>2</sub>O<sub>2</sub> selectivity, b) amount of H<sub>2</sub>O<sub>2</sub> and c) H<sub>2</sub>O<sub>2</sub> concentration and H<sub>2</sub>O<sub>2</sub> yield towards H<sub>2</sub>O<sub>2</sub> synthesis with different solvents. Reaction condition: 10 mL solvent, 0.02 M HCl, 2.9 MPa 5% H<sub>2</sub>/N<sub>2</sub>, 1.1 MPa 25% O<sub>2</sub>/N<sub>2</sub>, T = 0 °C, catalyst weight: 10 mg, time: 30 minutes, and stirring: 1200 rpm.

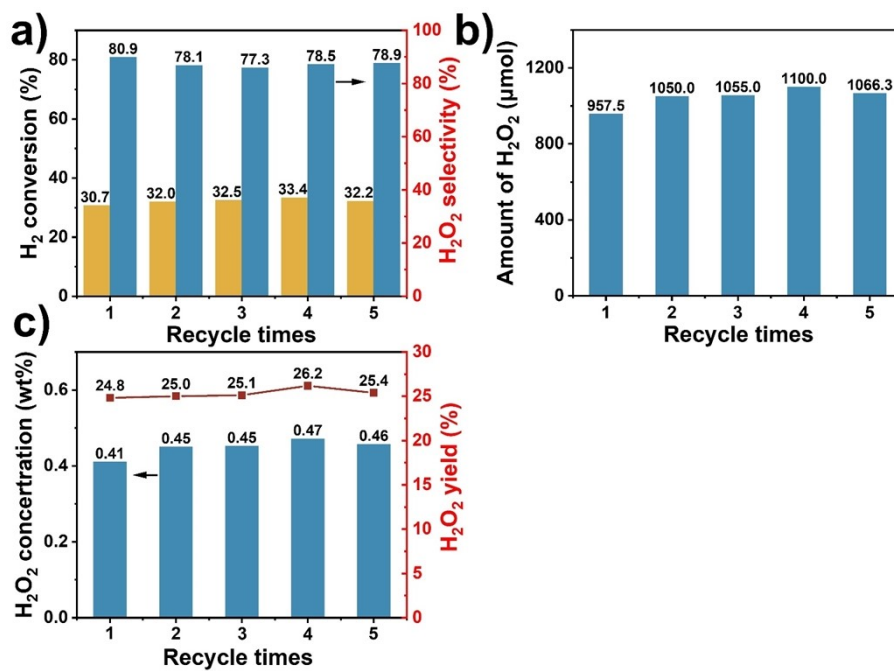

**Figure S17.** Stability test on Pt<sub>1</sub>Pd(111)/TiO<sub>2</sub> in 5 cycles. a) H<sub>2</sub> conversion and H<sub>2</sub>O<sub>2</sub> selectivity, b) amount of H<sub>2</sub>O<sub>2</sub>, and c) H<sub>2</sub>O<sub>2</sub> concentration and H<sub>2</sub>O<sub>2</sub> yield in 5 cycles. Reaction condition: 10 mL CH<sub>3</sub>OH, 0.02 M HCl, 2.9 MPa 5% H<sub>2</sub>/N<sub>2</sub>, 1.1 MPa 25% O<sub>2</sub>/N<sub>2</sub>, T = 0 °C, catalyst weight: 10 mg, time: 10 minutes, and stirring: 1200 rpm.

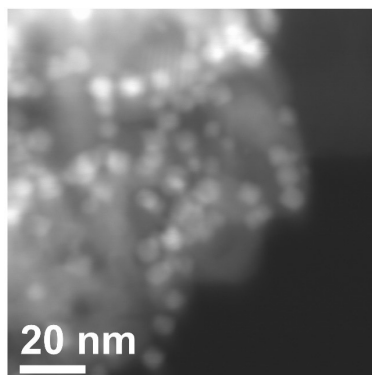

**Figure S18.** STEM image of Pt<sub>1</sub>Pd(111)/TiO<sub>2</sub> after reaction.

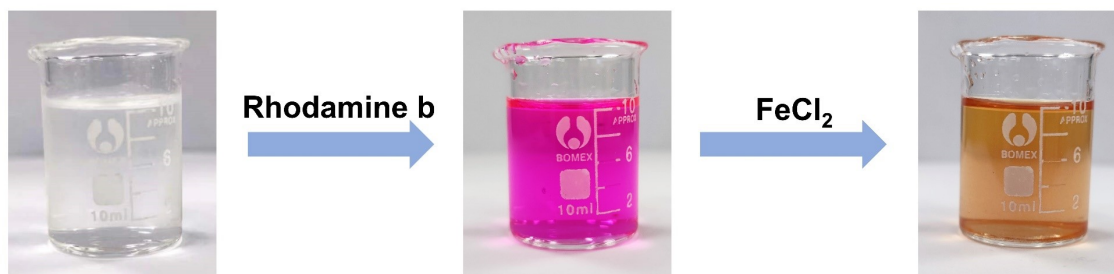

**Figure S19.** The photographs of a) as-synthesized  $\text{H}_2\text{O}_2$  solution, (b) rhodamine b (20 ppm) in the as-synthesized  $\text{H}_2\text{O}_2$  solution, and (c) the liquor after Fenton reaction using  $\text{FeCl}_2$ .

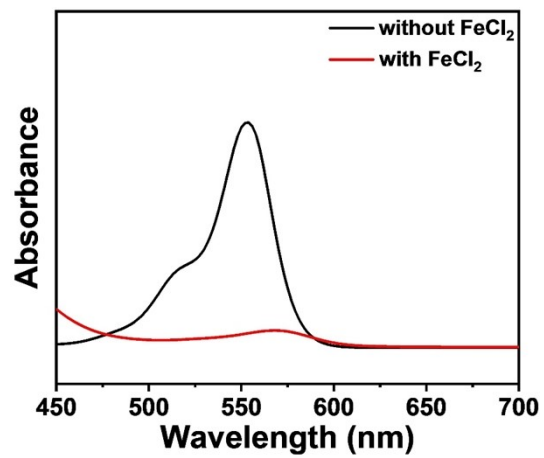

**Figure S20.** UV-Vis spectra of rhodamine b (20 ppm) in the as-synthesized H<sub>2</sub>O<sub>2</sub> solution and the liquor after Fenton reaction using FeCl<sub>2</sub>.

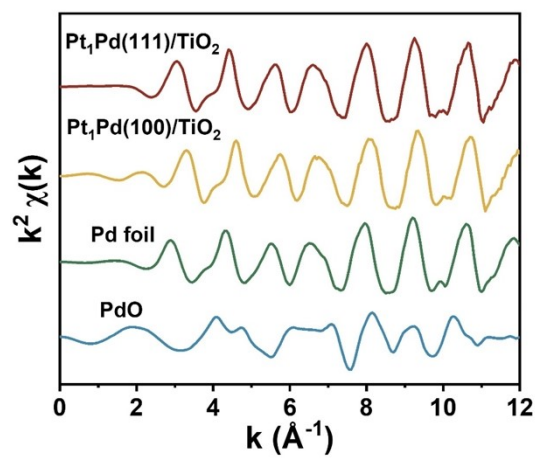

**Figure S21.** Pd K-edge XANES profiles in K space.

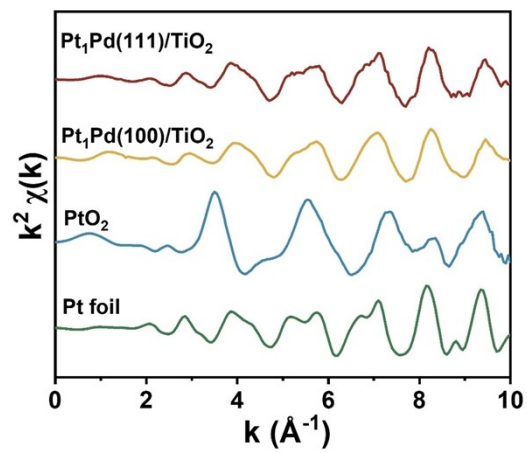

**Figure S22.** Pt L3-edge XANES profiles in K space.

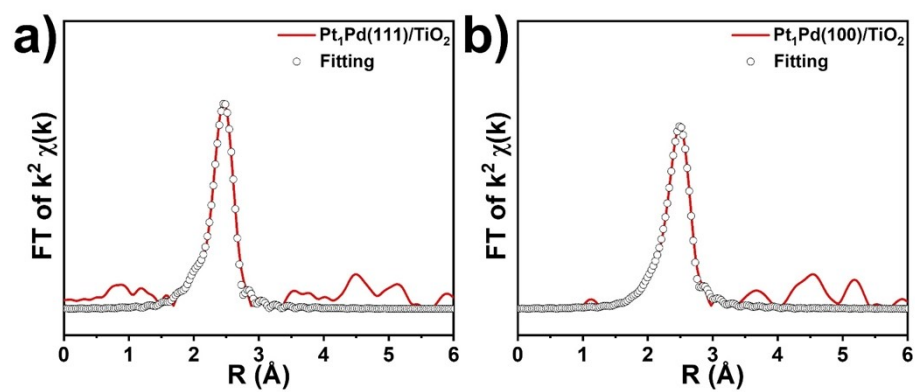

**Figure S23.** R-space fitting curves for the Pd K-edge of a)  $\text{Pt}_1\text{Pd}(111)/\text{TiO}_2$ , and b)  $\text{Pt}_1\text{Pd}(100)/\text{TiO}_2$ .



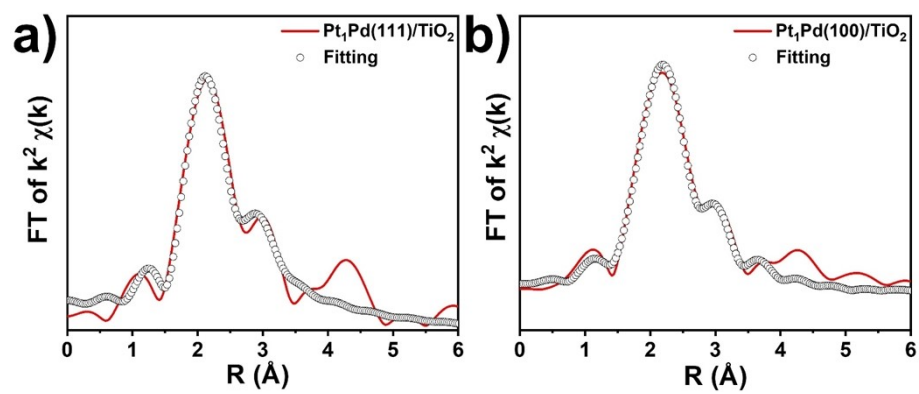

**Figure S24.** R-space fitting curves for the Pt L3-edge of a)  $\text{Pt}_1\text{Pd}(111)/\text{TiO}_2$  and b)  $\text{Pt}_1\text{Pd}(100)/\text{TiO}_2$ .

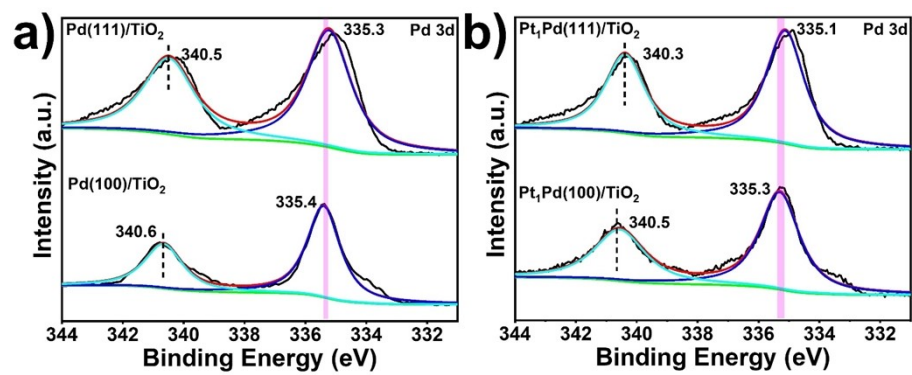

**Figure S25.** a) Pd 3d XPS spectra of Pd(111)/TiO<sub>2</sub> and Pd(100)/TiO<sub>2</sub>. b) Pd 3d XPS spectra of Pt<sub>1</sub>Pd(111)/TiO<sub>2</sub> and Pt<sub>1</sub>Pd(100)/TiO<sub>2</sub>.

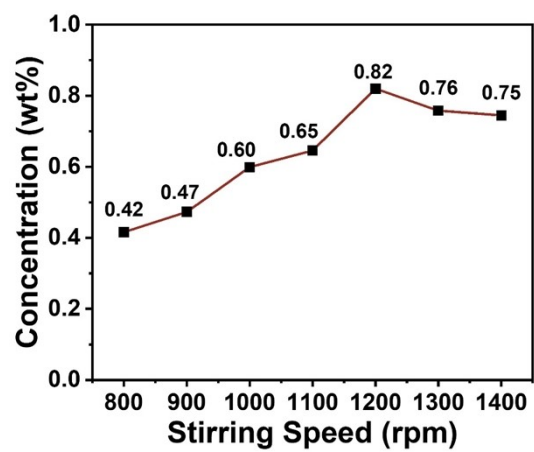

**Figure S26.** The comparison of  $\text{H}_2\text{O}_2$  concentration on  $\text{Pt}_1\text{Pd}(111)/\text{TiO}_2$  in the direct synthesis of  $\text{H}_2\text{O}_2$  under different stirring rate.

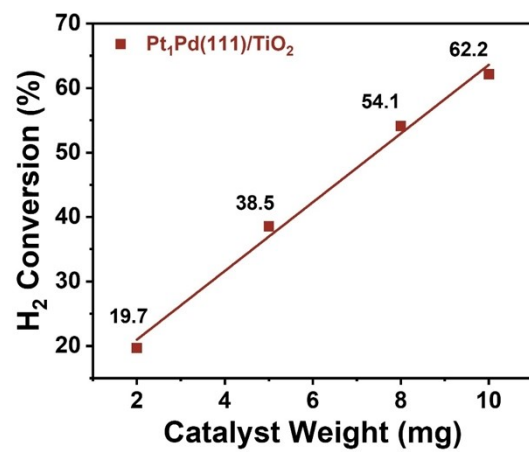

**Figure S27.** The comparison of H<sub>2</sub> conversion on Pt<sub>1</sub>Pd(111)/TiO<sub>2</sub> in the direct synthesis of H<sub>2</sub>O<sub>2</sub> with different catalyst weight.

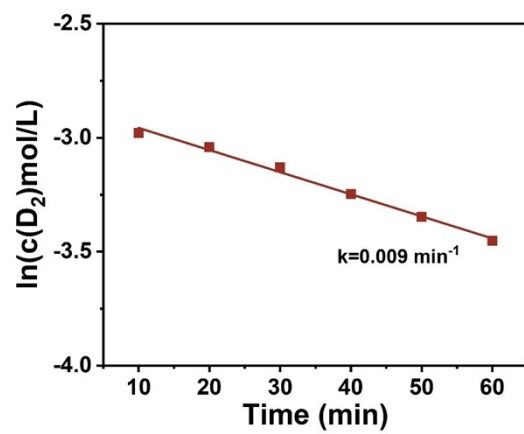

**Figure S28.** The apparent rate constant for  $D_2O_2$  synthesis using  $D_2$ .

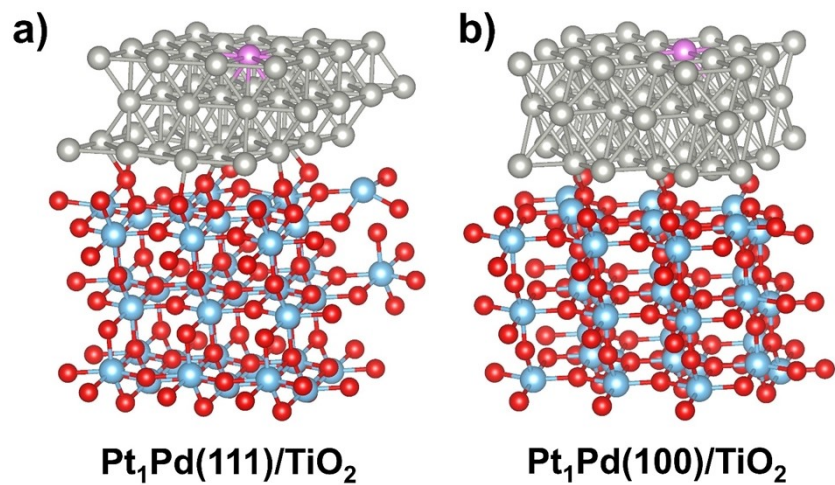

**Figure S29.** The structure models of  $\text{Pt}_1\text{Pd}(111)/\text{TiO}_2$  and  $\text{Pt}_1\text{Pd}(100)/\text{TiO}_2$ . The pink, gray, red, and light blue spheres represent Pt, Pd, O, and Ti atoms, respectively.

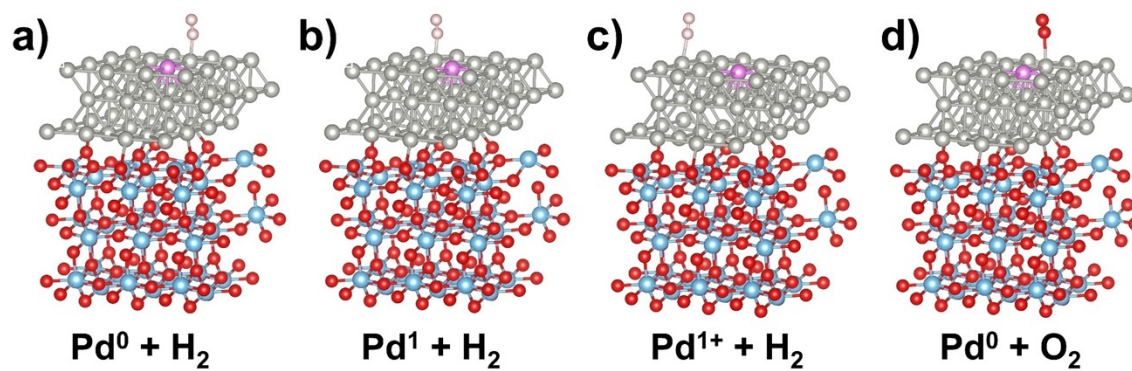

**Figure S30.** The adsorption structure models of  $\text{H}_2$  on  $\text{Pt}_1\text{Pd}(111)/\text{TiO}_2$ . a)  $\text{H}_2$  adsorbed at the Pd site ( $\text{Pd}^0$ ) connected to Pt atom. b)  $\text{H}_2$  adsorbed at the Pd site ( $\text{Pd}^1$ ) away from Pt atom. c)  $\text{H}_2$  adsorbed at the Pd site ( $\text{Pd}^{1+}$ ) further away from Pt atom. d)  $\text{O}_2$  adsorbed at the Pd site ( $\text{Pd}^0$ ) connected to Pt atom.

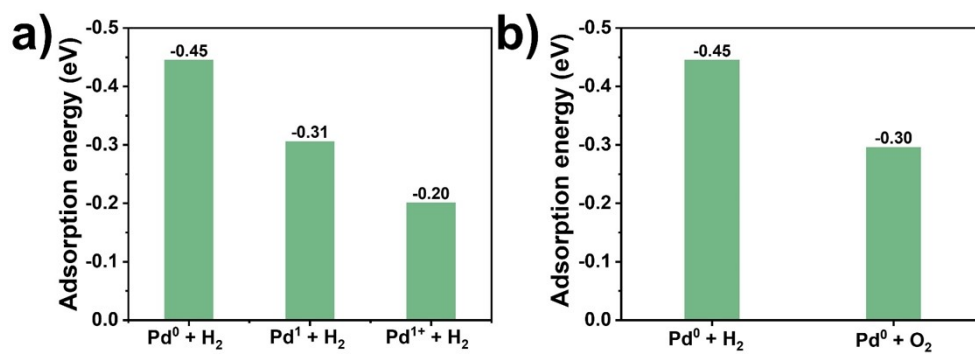

**Figure S31.** a) The adsorption energies of H<sub>2</sub> on different Pd sites over Pt<sub>1</sub>Pd(111)/TiO<sub>2</sub>.

b) The adsorption energies of H<sub>2</sub> and O<sub>2</sub> on the Pd site connected to Pt atom over

Pt<sub>1</sub>Pd(111)/TiO<sub>2</sub>.



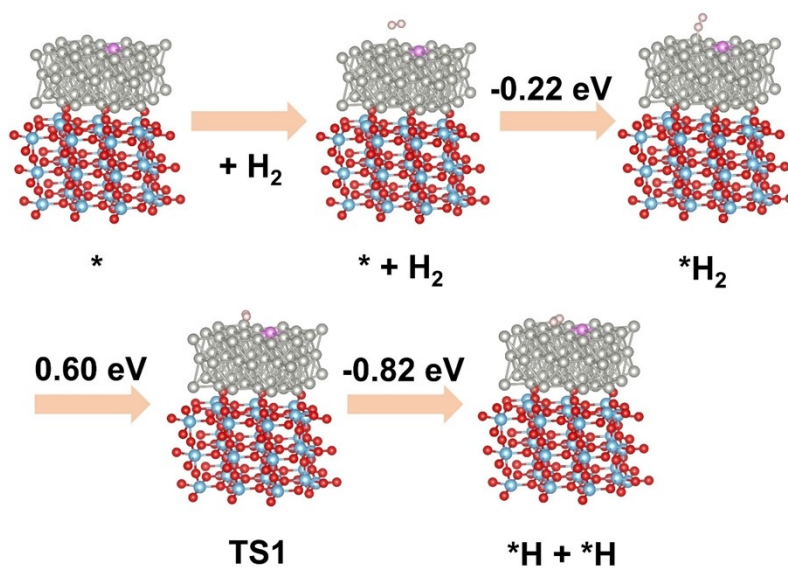

**Figure S32.** The process of H<sub>2</sub> dissociation on Pt<sub>1</sub>Pd(100)/TiO<sub>2</sub>.

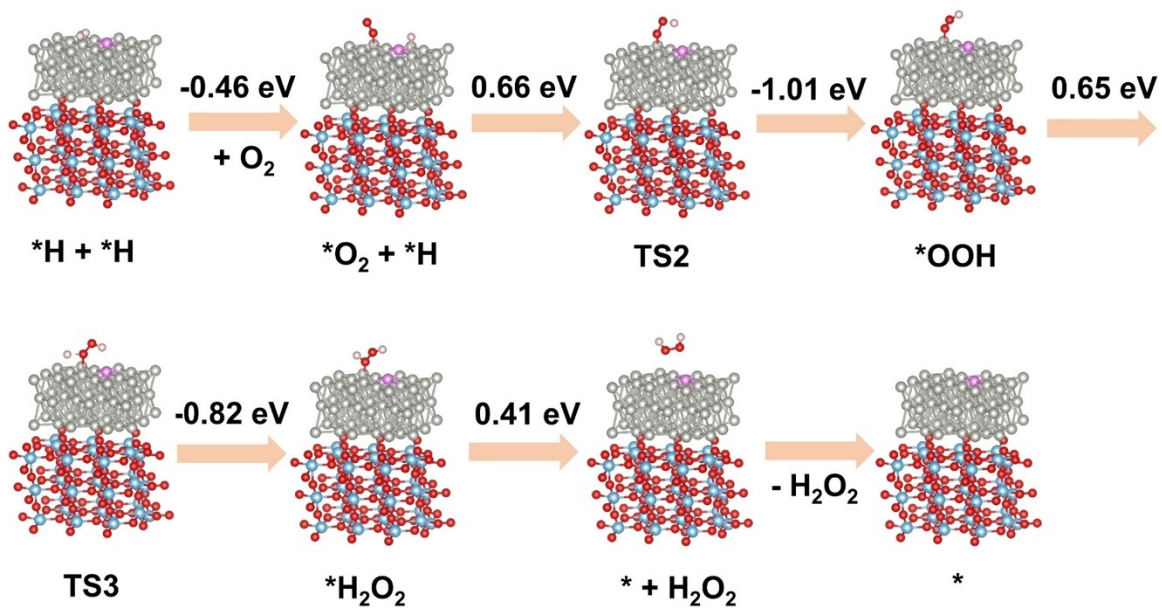

**Figure S33.** The process of  $O_2$  hydrogenation to  $H_2O_2$  on  $Pt_1Pd(100)/TiO_2$ .

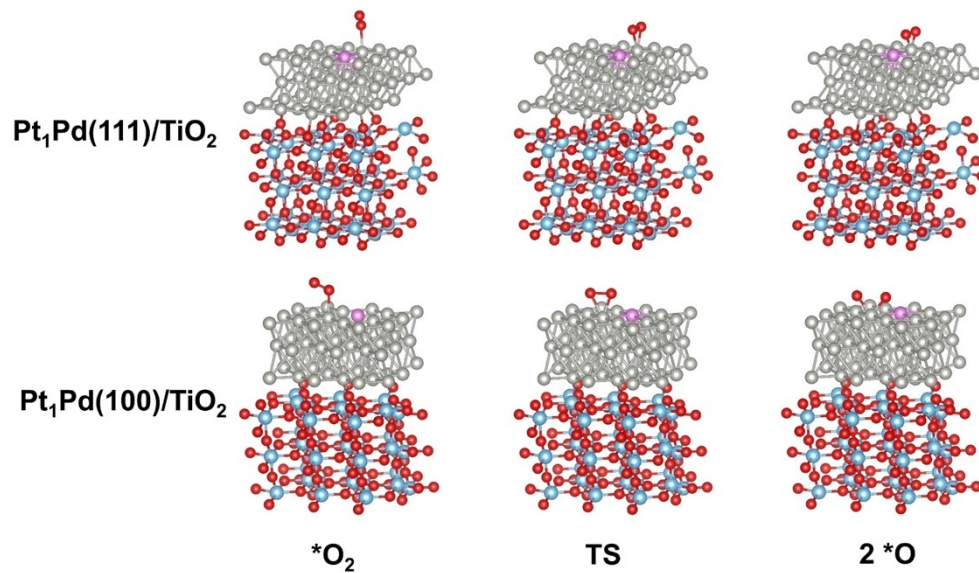

**Figure S34.** The process of  $^*\text{O}_2$  dissociation on  $\text{Pt}_1\text{Pd}(111)/\text{TiO}_2$  and  $\text{Pt}_1\text{Pd}(100)/\text{TiO}_2$ .

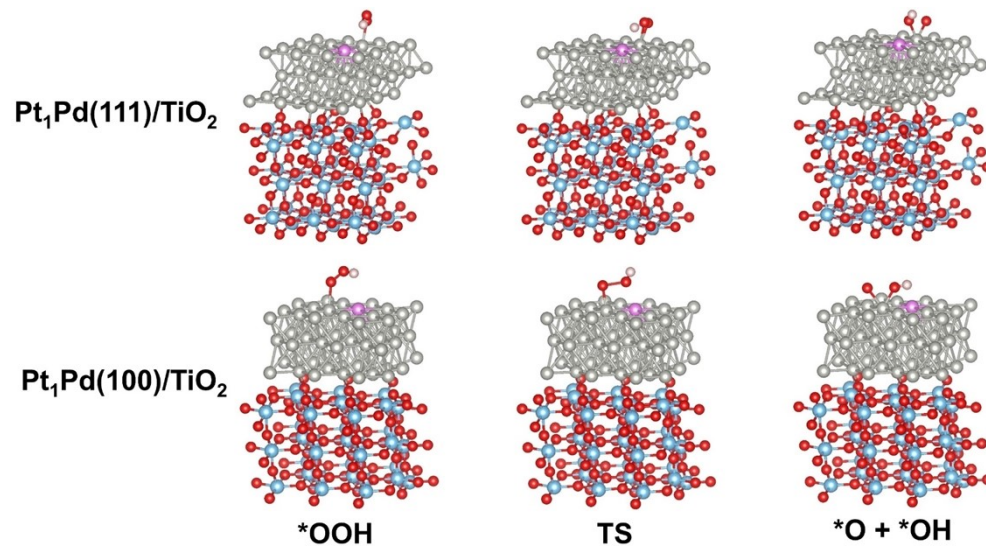

**Figure S35.** The process of \*OOH dissociation on  $\text{Pt}_1\text{Pd}(111)/\text{TiO}_2$  and  $\text{Pt}_1\text{Pd}(100)/\text{TiO}_2$ .

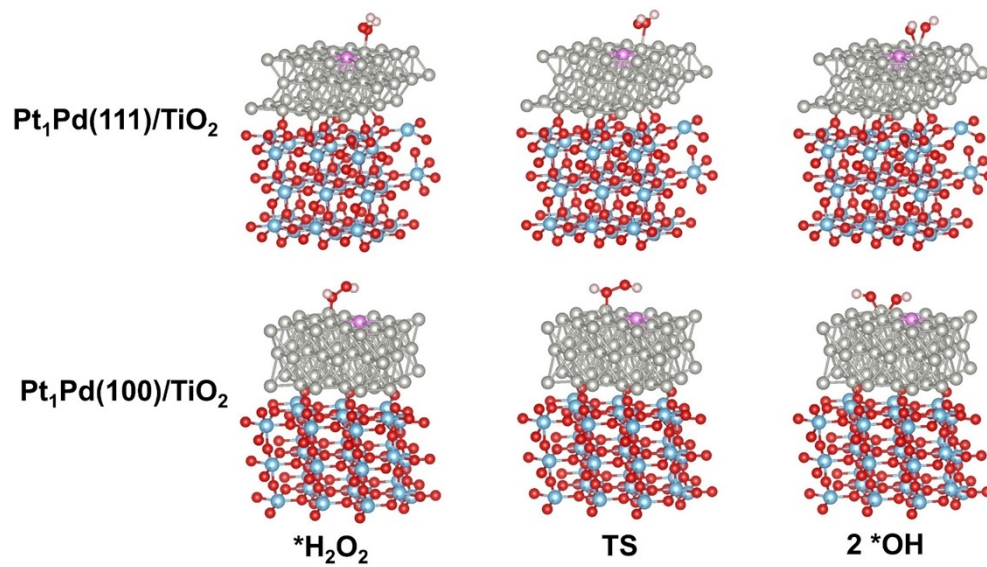

**Figure S36.** The process of \*H<sub>2</sub>O<sub>2</sub> dissociation on Pt<sub>1</sub>Pd(111)/TiO<sub>2</sub> and Pt<sub>1</sub>Pd(100)/TiO<sub>2</sub>.

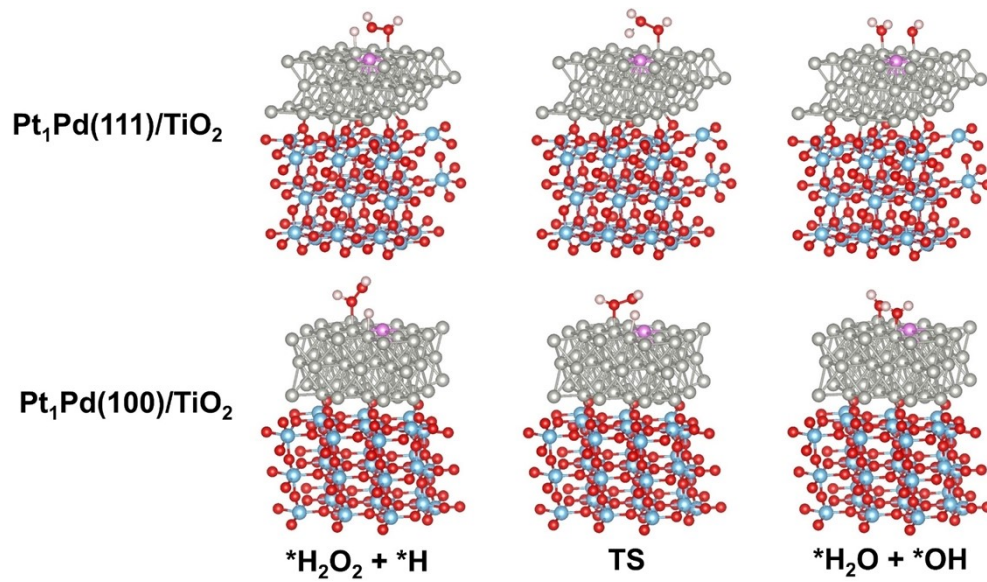

**Figure S37.** The process of \*H<sub>2</sub>O<sub>2</sub> hydrogenation on Pt<sub>1</sub>Pd(111)/TiO<sub>2</sub> and Pt<sub>1</sub>Pd(100)/TiO<sub>2</sub>.

**Table S1.** Elemental analysis of various catalysts.

| Entry | Catalysts                                                | Pd/Pt<br>(atomic<br>ratio) | Nominal loading |          | Actual loading <sup>a</sup> |          |
|-------|----------------------------------------------------------|----------------------------|-----------------|----------|-----------------------------|----------|
|       |                                                          |                            | Pd (wt%)        | Pt (wt%) | Pd (wt%)                    | Pt (wt%) |
| 1     | Pt <sub>1</sub> Pd(111)/TiO <sub>2</sub>                 | 80                         | 3.5             | 0.075    | 3.3                         | 0.09     |
| 2     | Pt <sub>1</sub> Pd(100)/TiO <sub>2</sub>                 | 80                         | 3.5             | 0.075    | 3.4                         | 0.08     |
| 3     | Pd(111)/TiO <sub>2</sub>                                 | -                          | 3.5             | -        | 3.2                         | -        |
| 4     | Pd(100)/TiO <sub>2</sub>                                 | -                          | 3.5             | -        | 3.6                         | -        |
| 5     | Pt <sub>1</sub> Pd(111) <sub>40</sub> /TiO <sub>2</sub>  | 40                         | 3.5             | 0.150    | 3.7                         | 0.17     |
| 6     | Pt <sub>1</sub> Pd(111) <sub>120</sub> /TiO <sub>2</sub> | 120                        | 3.5             | 0.050    | 3.5                         | 0.07     |
| 7     | Pt <sub>1</sub> Pd(111)/TiO <sub>2</sub> -used           | 80                         | 3.5             | 750      | 3.2                         | 0.09     |

<sup>a</sup>Determined by ICP-AES.

**Table S2.** EXAFS fitting parameters at the Pd K-edge for Pt<sub>1</sub>Pd(111)/TiO<sub>2</sub> and Pt<sub>1</sub>Pd(100)/TiO<sub>2</sub>.

| Sample                                   | Shell | C. N.    | R(Å)       | $\sigma^2$ (Å <sup>2</sup> ) | $\Delta E_0$ (eV) | R factor |
|------------------------------------------|-------|----------|------------|------------------------------|-------------------|----------|
| Pt <sub>1</sub> Pd(111)/TiO <sub>2</sub> | Pd–Pd | 11.6±0.8 | 2.74±0.005 | 0.053±0.001                  | 3.0±0.5           | 0.011    |
|                                          | Pd–Pt | 0.8±0.9  | 2.68±0.03  | 0.003±0.003                  |                   |          |
| Pt <sub>1</sub> Pd(100)/TiO <sub>2</sub> | Pd–Pd | 11.5±0.6 | 2.74±0.003 | 0.002±0.001                  | 3.2±0.4           | 0.005    |
|                                          | Pd–Pt | 0.6±0.5  | 2.70±0.02  | 0.002±0.002                  |                   |          |



**Table S3.** EXAFS fitting parameters at the Pt L<sub>3</sub>-edge for Pt<sub>1</sub>Pd(111)/TiO<sub>2</sub> and

| Sample                                   | Shell    | C. N.    | R(Å)     | σ <sup>2</sup> (Å <sup>2</sup> ) | ΔE <sub>0</sub> (eV) | R factor |
|------------------------------------------|----------|----------|----------|----------------------------------|----------------------|----------|
| Pt <sub>1</sub> Pd(111)/TiO <sub>2</sub> | Pt–Pd    | 3.4±5.3  | 2.4±0.07 | 0.013±0.025                      | -2.5±4.6             | 0.021    |
|                                          | Pt–Pd–Pt | 8.6±4.6  | 2.7±0.04 | 0.042±0.062                      |                      |          |
| Pt <sub>1</sub> Pd(100)/TiO <sub>2</sub> | Pt–Pd    | 2.6±2.8  | 2.4±0.03 | 0.004±0.013                      | 7.2±2.1              | 0.019    |
|                                          | Pt–Pd–Pt | 10.8±3.7 | 2.7±0.02 | 0.024±0.042                      |                      |          |

Pt<sub>1</sub>Pd(100)/TiO<sub>2</sub>.
